# Supplementary material for: Controllable assembly of multicarboxylic acids functionalized heteropolyoxomolybdates and allochroic properties
Source: Royal Society of Chemistry journal article supplement (doi:10.1039/c5tc00297d), 2015-01-01
Supplement: c5tc00297d1.pdf [file c5tc00297d1.pdf]

## Supplementary information

### Controllable assembly of multicarboxylic acids functionalized heteropolyoxomolybdates and allochroic properties

Yanfen Liang,<sup>a</sup> Suzhi Li,<sup>b</sup> Donghui Yang,<sup>a</sup> Pengtao Ma,<sup>a</sup> Jingyang Niu<sup>\*a</sup> and Jingping Wang<sup>\*a</sup>

<sup>a</sup> Key Laboratory of Polyoxometalate Chemistry of Henan Province, Institute of Molecular and Crystal Engineering, College of Chemistry and Chemical Engineering, Henan University, Kaifeng 475004, Henan, China. E-mail: [jpwang@henu.edu.cn](mailto:jpwang@henu.edu.cn), [jyniu@henu.edu.cn](mailto:jyniu@henu.edu.cn), Fax: (+86) 37123886876.

<sup>b</sup> College of Chemistry and Chemical Engineering, Engineering Research Center of Functional Material Preparation, Shangqiu Normal University, Shangqiu, 476000, Henan, China.

#### UV spectra

The UV spectra of compounds **1–3** in aqueous solution are shown in Fig. S1. Being consistent with the results of single crystal X-ray diffraction analyses, the spectra of **1–3** are almost the same in the range of 400–200 nm. They all have two characteristic peaks: the strong absorption bands at 208 nm for **1**, 208 nm for **2** and 210 nm for **3** can be assigned to the  $p\pi-d\pi$  charge-transfer transition of the  $O_t \rightarrow Mo$  bond.<sup>s1</sup> The weak ones at 230–240 nm for the three compounds are attributed to the  $p\pi-d\pi$  charge-transfer transition of the  $O_{b,c} \rightarrow Mo$  bond.<sup>s1</sup>

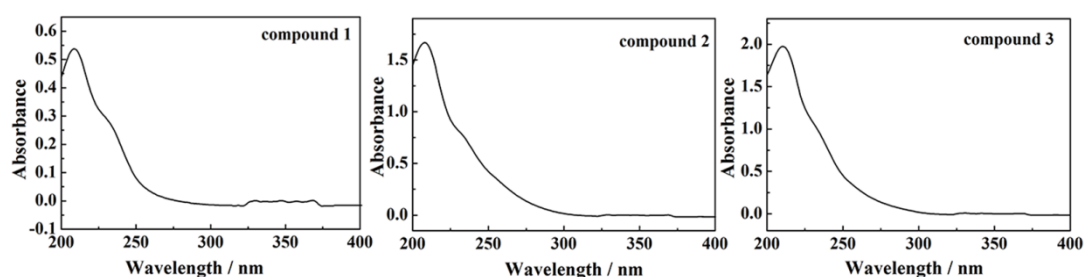

Fig. S1 UV spectra of compounds **1–3**.

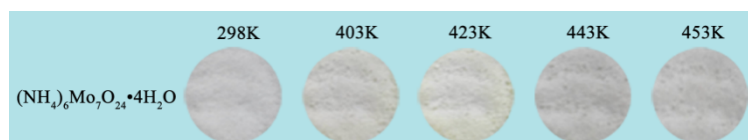

Fig. S2 Color of  $(NH_4)_6Mo_7O_{24} \cdot 4H_2O$  at different temperatures.

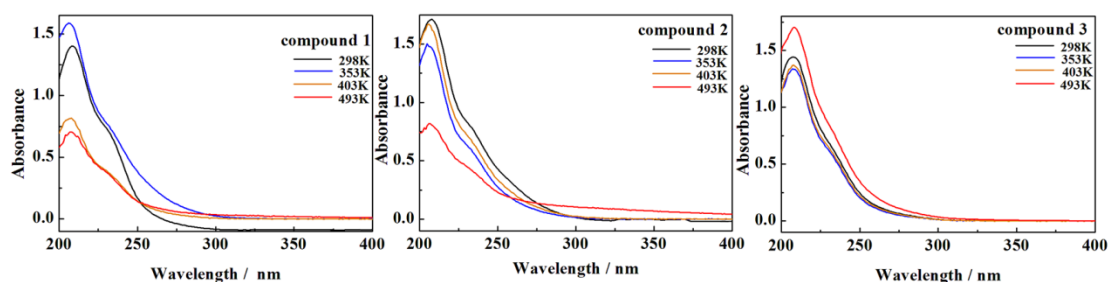

Fig. S3 UV spectra of compounds 1–3 after being heated at different temperatures.

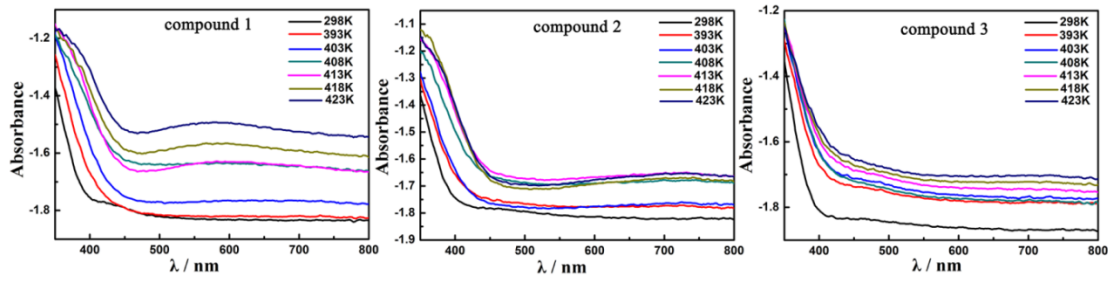

Fig. S4 The UV-vis diffuse reflectance spectra of compounds 1–3 at different temperatures.

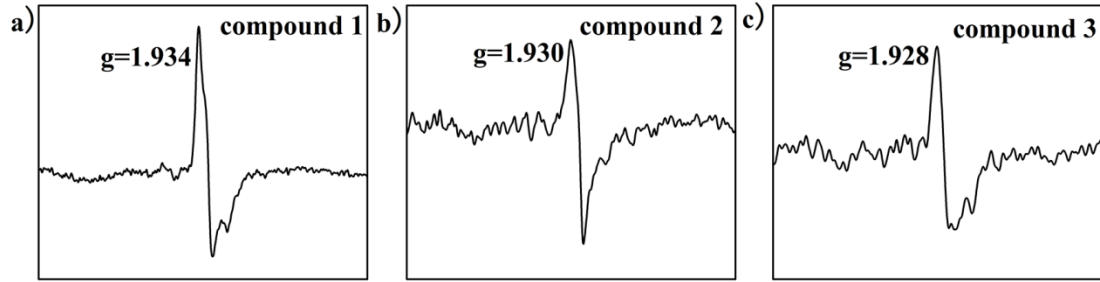

Fig. S5 EPR spectra of compounds 1–3 after being heated.

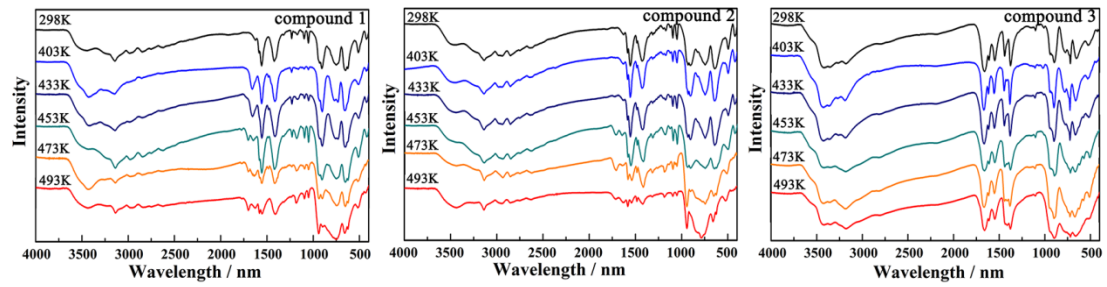

Fig. S6 VT IR spectra of compounds 1–3.

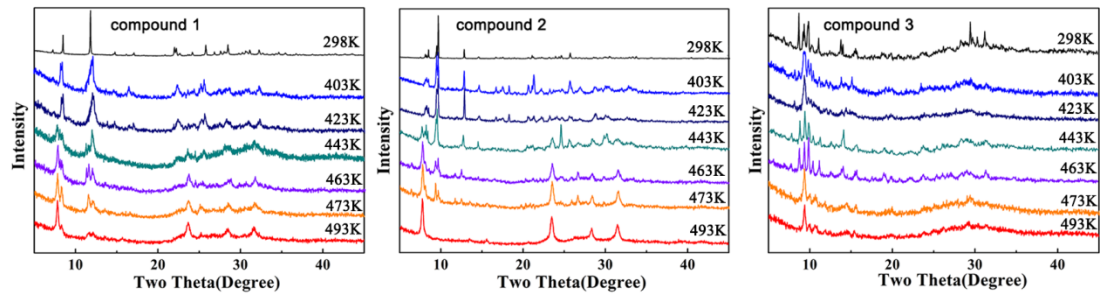

Fig. S7 VT XPRD of compounds 1–3.

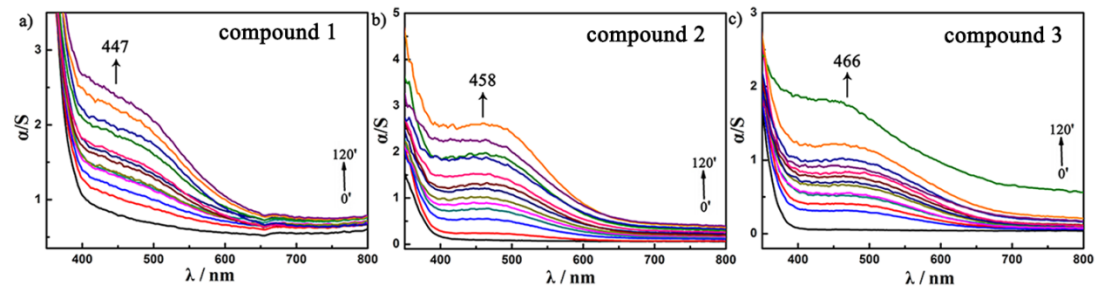

**Fig. S8** Kubelka–Munk transformed reflectivity of compounds 1–3 vs irradiation times of 0, 5, 10, 15, 20, 25, 30, 40, 50, 60, 80, 100 and 120 min.

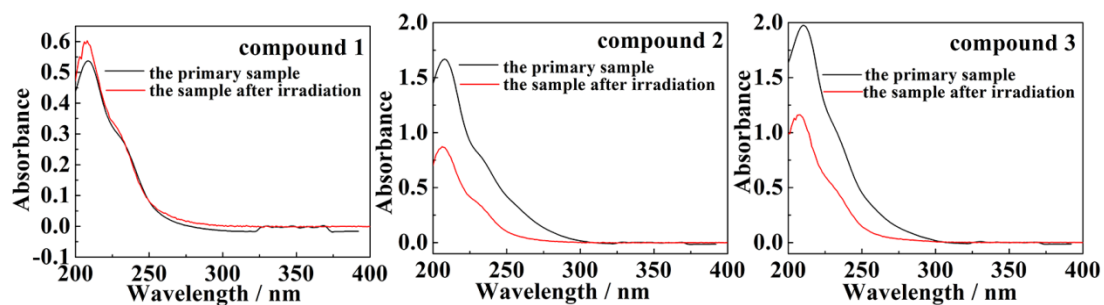

**Fig. S9** UV spectra of compounds 1–3 before and after irradiation.

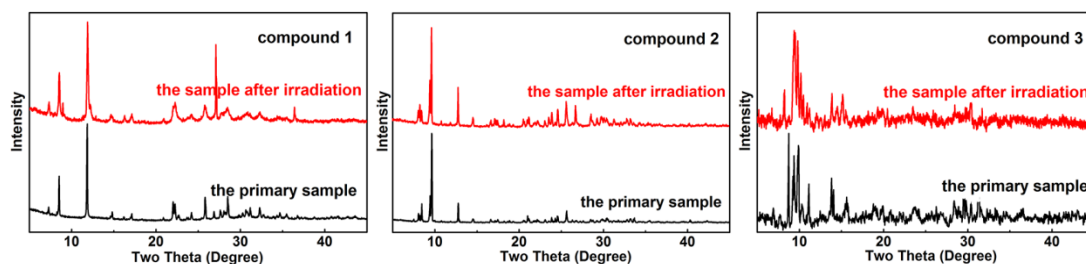

**Fig. S10** X-ray powder diffraction patterns of compounds 1–3. Black: Experiment XPRD patterns of pure primary samples; Red: Samples after irradiation.

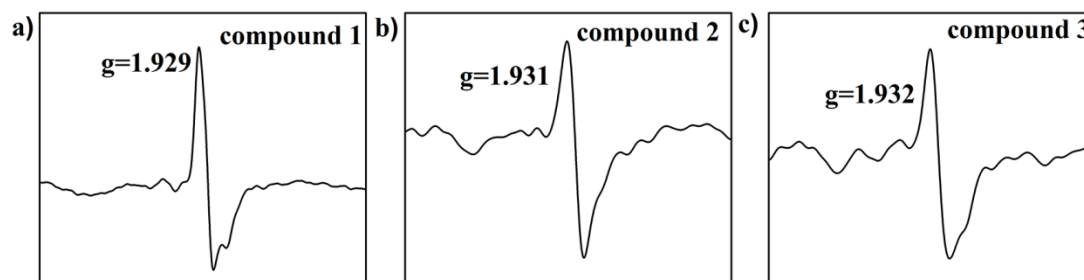

**Fig. S11** EPR spectra of compounds 1–3 after irradiation.

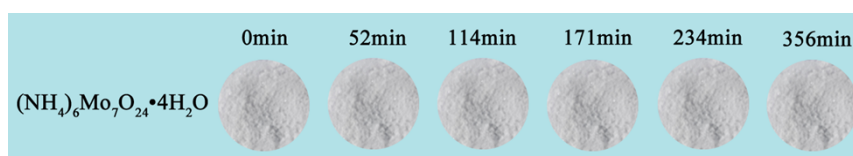

**Fig. S12** Color of  $(\text{NH}_4)_6\text{Mo}_7\text{O}_{24}\cdot 4\text{H}_2\text{O}$  after certain minutes irradiation by xenon lamp.

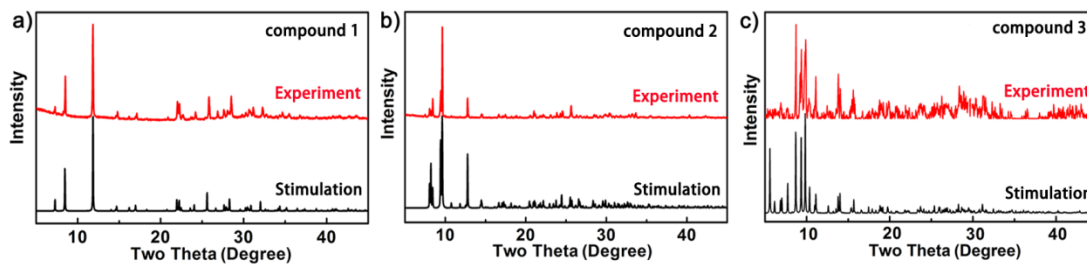

**Fig. S13** X-ray powder diffraction patterns of compounds 1–3. Black, the calculated patterns based on the single-crystal X-ray diffraction data. Red, the experimental XPRD patterns for the samples.

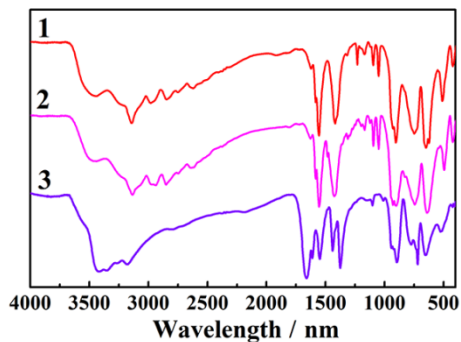

Fig. S14 IR spectra of 1–3.

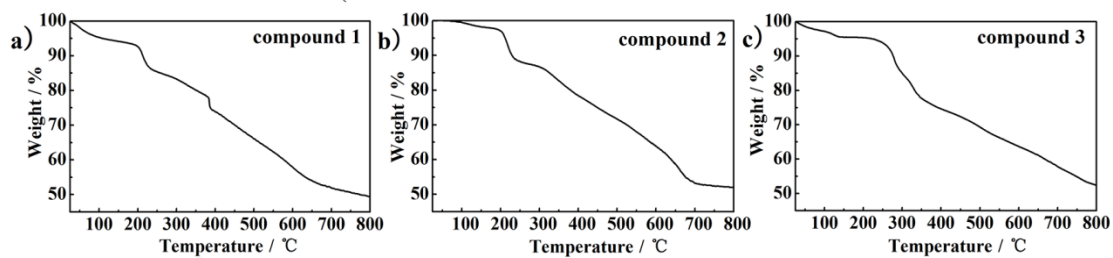

Fig. S15 TG curve of 1–3.

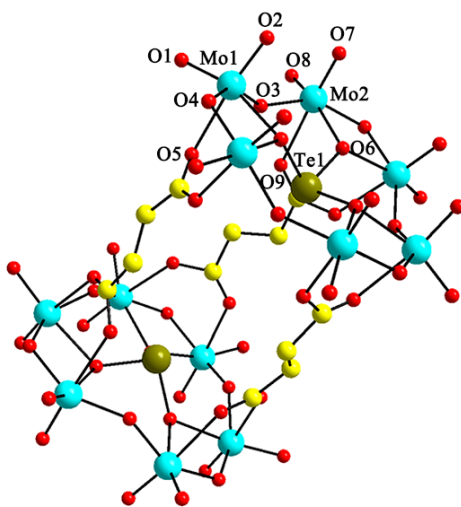

| Bond     | Bond length | Bond Valence | Valence Sum                  |
|----------|-------------|--------------|------------------------------|
| Mo(1)–O1 | 1.715(9)    | 1.680        | $\Sigma(\text{Mo1}) = 6.037$ |
| Mo(1)–O2 | 1.697(8)    | 1.764        |                              |
| Mo(1)–O3 | 1.928(8)    | 0.945        |                              |
| Mo(1)–O4 | 1.941(8)    | 0.912        |                              |
| Mo(1)–O5 | 2.331(8)    | 0.318        |                              |
| Mo(1)–O6 | 2.230(7)    | 0.418        |                              |

| Bond     | Bond length | Bond Valence | Valence Sum |
|----------|-------------|--------------|-------------|
| Mo(2)–O3 | 1.922(8)    | 0.960        |             |
| Mo(2)–O4 | 1.936(8)    | 0.925        |             |

|          |           |       |  |
|----------|-----------|-------|--|
| Mo(2)–O6 | 2.216(7)  | 0.434 |  |
| Mo(2)–O7 | 1.702(8)  | 1.740 |  |
| Mo(2)–O8 | 1.724(9)  | 1.640 |  |
| Mo(2)–O9 | 2.360(10) | 0.294 |  |

| Bond     | Bond length | Bond Valence | Valence Sum                  |
|----------|-------------|--------------|------------------------------|
| Te(1)–O6 | 1.882(7)    | 1.293        | $\Sigma(\text{Te1}) = 3.879$ |
| Te(1)–O6 | 1.882(7)    | 1.293        |                              |
| Te(1)–O6 | 1.882(7)    | 1.293        |                              |

**Table S1** Bond valence sum parameters for the Mo (1), Mo (2) and Te (1) in **1**. The bond valence sum parameters for other Mo and Te atoms for compound **1** as well as compound **2** and **3** are almost the same, so they are omitted.

| D–H···A           | $d(\text{H}\cdots\text{A})$ | $\angle\text{DHA}$ | $d(\text{D}\cdots\text{A})$ |
|-------------------|-----------------------------|--------------------|-----------------------------|
| N(1)–H(1A)···O(4) | 1.89                        | 164                | 2.7277                      |

| D–H···A              | $d(\text{H}\cdots\text{A})$ | $\angle\text{DHA}$ | $d(\text{D}\cdots\text{A})$ |
|----------------------|-----------------------------|--------------------|-----------------------------|
| N(1)–H(1A)···O(3)    | 2.01                        | 174                | 2.868                       |
| N(2)–H(2A)···O(6)    | 1.98                        | 169                | 2.826                       |
| N(3)–H(3A)···O(5)    | 2.09                        | 152                | 2.875                       |
| N(4)–H(4A)···O(2)    | 2.55                        | 123                | 3.102                       |
| N(4)–H(4A)···O(15)   | 2.17                        | 159                | 2.993                       |
| N(5)–H(5A)···O(11)   | 2.35                        | 162                | 3.176                       |
| N(6)–H(6A)···O(23)   | 2.40                        | 175                | 3.25                        |
| N(6)–H(6A)···O(27)   | 2.39                        | 109                | 2.79                        |
| N(8)–H(8A)···O(1)    | 2.54                        | 122                | 3.09                        |
| N(8)–H(8A)···O(17)   | 2.43                        | 124                | 3.00                        |
| N(9)–H(9A)···O(1W)   | 2.03                        | 162                | 2.86                        |
| N(10)–H(10A)···O(14) | 2.07                        | 161                | 2.90                        |

| D–H···A            | $d(\text{H}\cdots\text{A})$ | $\angle\text{DHA}$ | $d(\text{D}\cdots\text{A})$ |
|--------------------|-----------------------------|--------------------|-----------------------------|
| N(1)–H(1B)···O(5)  | 2.58                        | 142                | 3.335                       |
| N(2)–H(2A)···O(1)  | 2.07                        | 147                | 2.870                       |
| N(2)–H(2B)···O(11) | 2.03                        | 178                | 2.926                       |
| N(3)–H(3A)···O(52) | 2.49                        | 138                | 3.220                       |
| N(3)–H(3A)···O(54) | 2.14                        | 147                | 2.938                       |
| N(3)–H(3B)···O(12) | 2.04                        | 163                | 2.913                       |
| N(4)–H(4A)···O(12) | 2.40                        | 150                | 3.209                       |
| N(4)–H(4B)···O(50) | 2.20                        | 146                | 2.984                       |
| N(5)–H(5A)···O(13) | 2.00                        | 159                | 2.859                       |
| N(5)–H(5B)···O(34) | 1.98                        | 156                | 2.822                       |
| N(6)–H(6A)···O(35) | 2.29                        | 160                | 3.151                       |
| N(6)–H(6B)···O(1W) | 1.92                        | 167                | 2.801                       |
| N(8)–H(8A)···O(7)  | 2.04                        | 148                | 2.847                       |

|                      |      |     |       |
|----------------------|------|-----|-------|
| N(8)–H(8B)···O(25)   | 2.07 | 176 | 2.969 |
| N(9)–H(9A)···O(29)   | 2.07 | 148 | 2.880 |
| N(9)–H(9B)···O(26)   | 2.06 | 167 | 2.939 |
| N(10)–H(10A)···O(17) | 2.13 | 143 | 2.901 |
| N(11)–H(11A)···O(17) | 2.27 | 140 | 3.013 |
| N(11)–H(11B)···O(34) | 2.57 | 106 | 2.954 |
| N(11)–H(11B)···O(38) | 2.24 | 164 | 3.110 |
| N(12)–H(12A)···O(21) | 2.16 | 141 | 2.915 |
| N(13)–H(13A)···O(21) | 2.09 | 143 | 2.860 |
| N(13)–H(13B)···O(48) | 2.20 | 150 | 3.019 |
| N(13)–H(13B)···O(50) | 2.56 | 107 | 2.945 |
| N(14)–H(14A)···O(8)  | 2.01 | 175 | 2.909 |
| N(14)–H(14B)···O(53) | 2.12 | 167 | 3.003 |
| N(15)–H(15B)···O(20) | 2.22 | 157 | 3.067 |
| N(16)–H(16A)···O(15) | 2.54 | 124 | 3.129 |
| N(16)–H(16B)···O(2W) | 2.28 | 154 | 3.115 |
| N(16)–H(16B)···O(16) | 2.52 | 122 | 3.095 |
| N(17)–H(17A)···O(4W) | 2.13 | 151 | 2.95  |
| N(17)–H(17B)···O(6W) | 2.21 | 159 | 3.06  |
| N(18)–H(18A)···O(7W) | 2.14 | 162 | 3.01  |
| N(18)–H(18B)···O(36) | 2.25 | 160 | 3.114 |
| N(19)–H(19A)···O(4W) | 2.57 | 137 | 3.28  |
| N(19)–H(19B)···O(40) | 2.29 | 170 | 3.18  |
| N(21)–H(21A)···O(40) | 2.35 | 140 | 3.09  |
| N(21)–H(21B)···O(1)  | 2.41 | 128 | 3.06  |
| N(22)–H(22A)···O(36) | 2.22 | 161 | 3.08  |
| N(22)–H(22B)···O(4W) | 2.58 | 121 | 3.05  |
| N(23)–H(23A)···O(1W) | 2.48 | 145 | 3.25  |
| N(24)–H(24B)···O(54) | 2.38 | 139 | 3.12  |
| N(25)–H(25B)···O(54) | 2.17 | 149 | 2.99  |
| N(28)–H(28B)···O(2)  | 2.23 | 140 | 2.973 |
| N(28)–H(28B)···O(26) | 2.38 | 134 | 3.074 |
| N(29)–H(29A)···O(28) | 2.38 | 126 | 3.002 |
| N(29)–H(29B)···O(16) | 2.42 | 152 | 3.242 |
| N(29)–H(29B)···O(17) | 2.26 | 138 | 2.989 |
| N(30)–H(30A)···O(26) | 2.43 | 137 | 3.150 |
| N(30)–H(30B)···O(16) | 2.27 | 162 | 3.138 |

**Table S2** Selected hydrogen-bond lengths (Å) and angles (°) for compounds **1–3**.

|          | $\nu_{\text{as}}(\text{COO})$ |      |      | $\nu_{\text{s}}(\text{COO})$ |      |
|----------|-------------------------------|------|------|------------------------------|------|
| <b>1</b> | 1625                          | 1552 |      | 1417                         |      |
| <b>2</b> | 1625                          | 1552 |      | 1429                         |      |
| <b>3</b> | 1661                          | 1602 | 1547 | 1440                         | 1373 |

**Table S3** Carboxyl stretching frequencies in **1–3** ( $\text{cm}^{-1}$ ).

S1 J. Y. Niu, J. A. Hua, X. Ma and J. P. Wang, *CrystEngComm.*, 2012, **14**, 4060.
